# Supplementary material for: Atomic layer deposited tungsten nitride thin films as a new lithium-ion battery anode
Source: Royal Society of Chemistry journal article supplement (doi:10.1039/c5cp02184g), 2015-01-01
Supplement: c5cp02184g1.pdf [file c5cp02184g1.pdf]

## Supporting Information

### Atomic Layer Deposited Tungsten Nitride Thin Films as New Lithium-ion Battery Anode

*Dip K Nandi, Uttam K. Sen, Soumyadeep Sinha, Arpan Dhara, Sagar Mitra\* and Shaibal K Sarkar\**

*Department of Energy Science and Engineering, IIT Bombay, Mumbai 40 076.*

*\*email: shaibal.sarkar@iitb.ac.in*

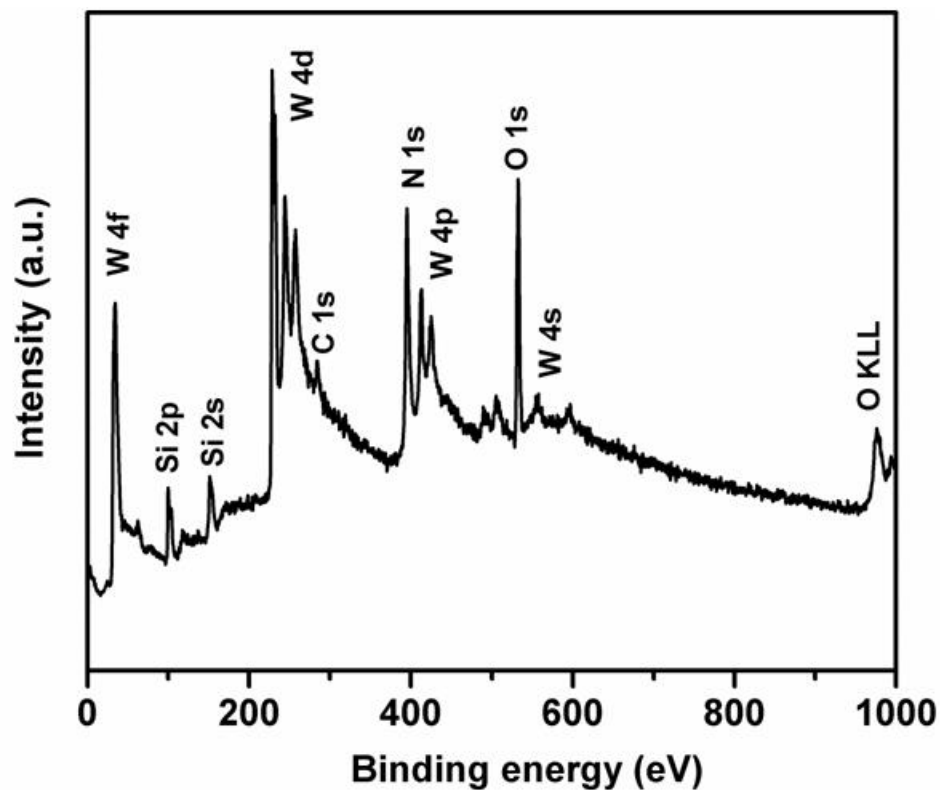

Fig. S1 XPS survey of the as-grown  $\text{WN}_x$  film in a complete binding energy range of 0-1000 eV

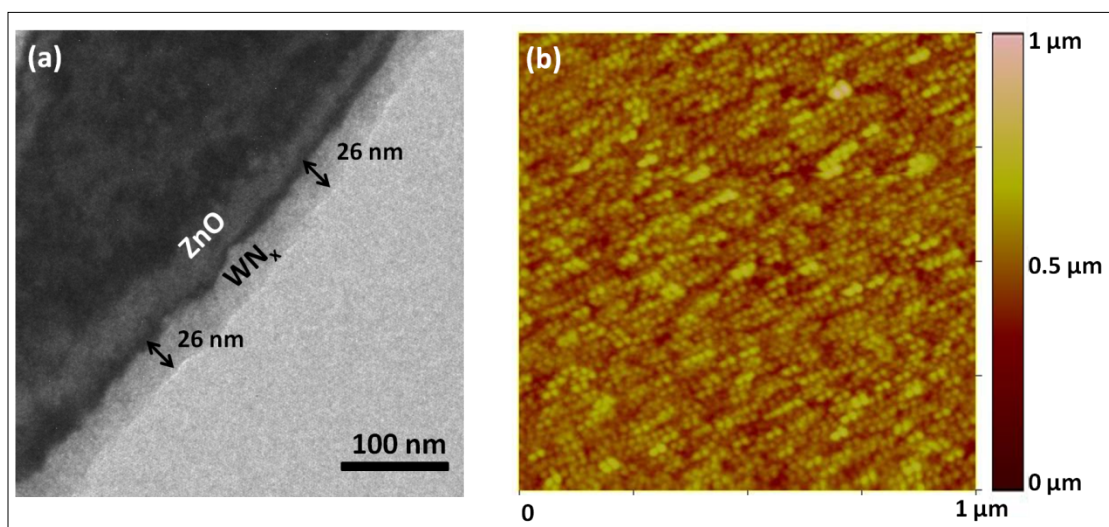

Fig. S2(a) HR-TEM image of ALD  $\text{WN}_x$  on ZnO and (b) surface AFM of the as-grown film

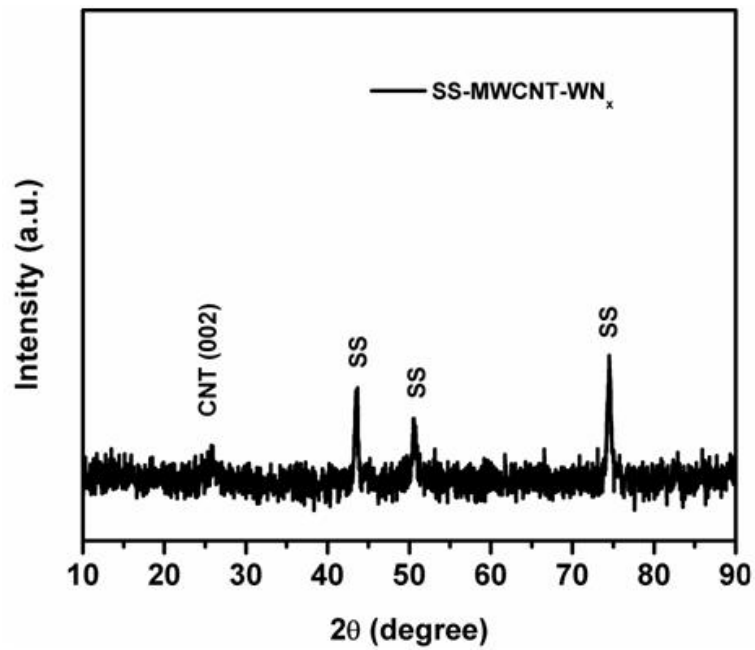

Fig. S3 X-ray diffraction of MWCNT-WN<sub>x</sub> film on SS substrate

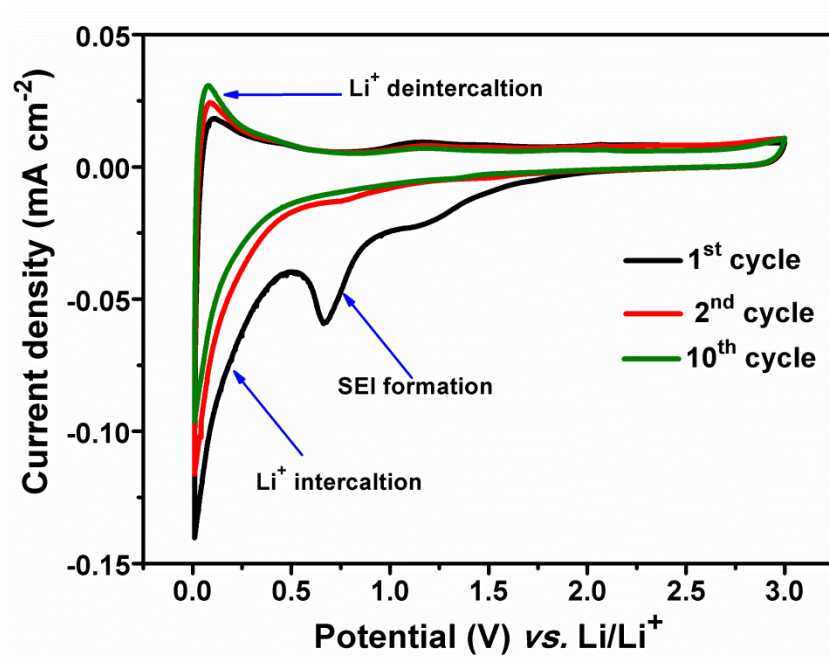

Fig. S4 Cyclic Voltammetry of MWCNT with scan rate of 0.2 mVs<sup>-1</sup> against Li/Li<sup>+</sup>

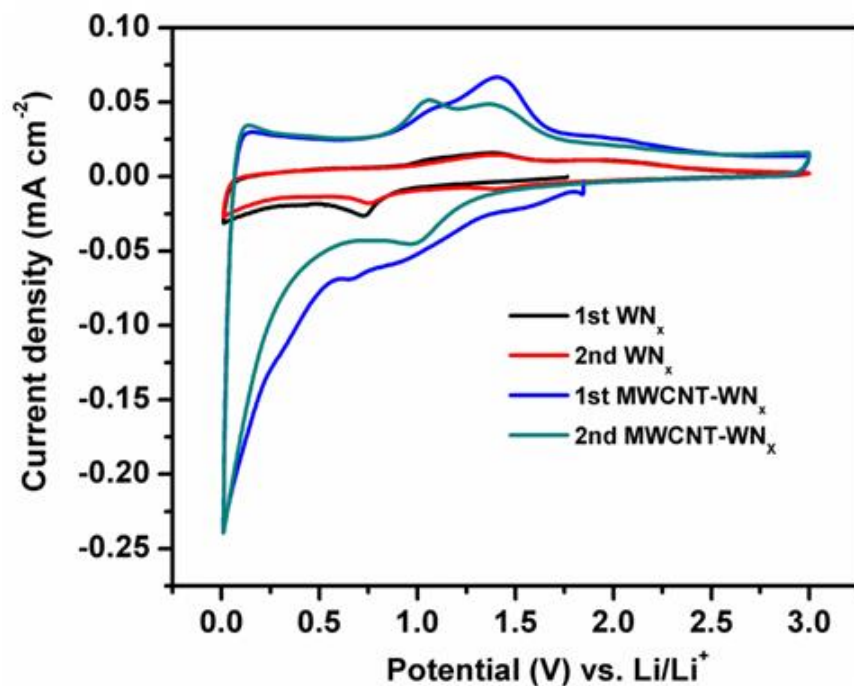

Fig. S5 CV of first two cycles for the as-grown film and film on MWCNT showing the capacity increment of the MWCNT-WN<sub>x</sub> assembly

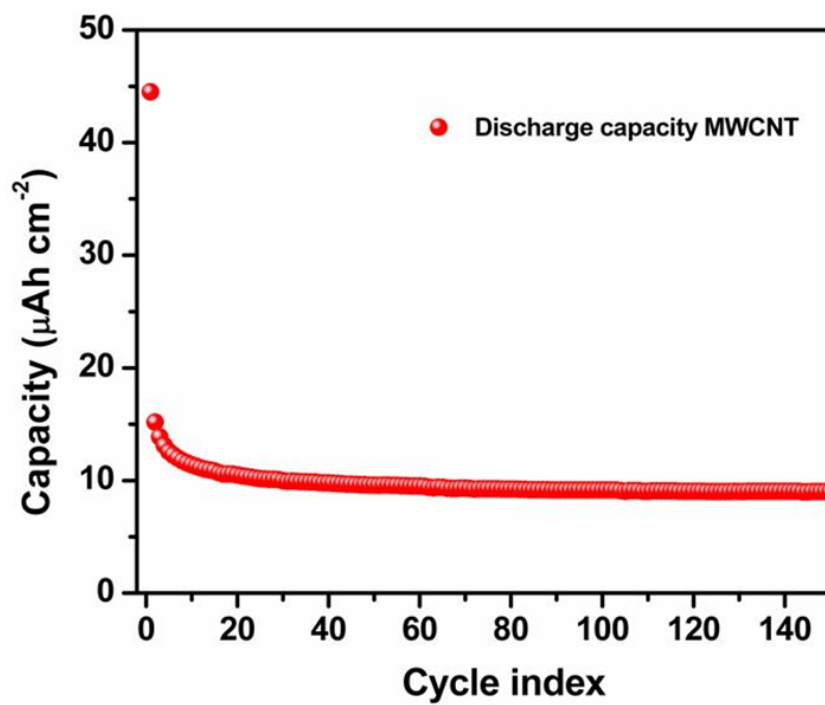

Fig. S6 Discharge capacity with cycle index for MWCNT at a scan rate of  $50 \mu\text{A cm}^{-2}$  against Li/Li<sup>+</sup>
